# Supplementary material for: Preclinical safety and efficacy of an anti–HIV-1 lentiviral vector containing a short hairpin RNA to CCR5 and the C46 fusion inhibitor
Source: PubMed Central journal article supplement — Mol Ther Methods Clin Dev. 2014 Feb 12;1:11–. doi: 10.1038/mtm.2013.11 (PMC4365823; doi:10.1038/mtm.2013.11), 2014-02-12
Supplement: mtm201311-s4.pdf [file mtm201311-s4.pdf]

**Table S1****Table S1:** Replication-Competent Lentivirus (RCL) analysis of sh5/C46 (Cal-1) batches show no detection of p24 capsid protein or HIV-1 psi-gag recombination

| <b>Cal-1 lentiviral vector</b>        | <b>Test Sample</b> | <b>Assay</b> | <b>Result</b> |
|---------------------------------------|--------------------|--------------|---------------|
| <b>Cal-1<br/>(GLP grade)</b>          | Supernatant        | p24 ELISA    | Negative      |
|                                       | Supernatant        | psi-gag PCR  | Negative      |
| <b>Cal-1<br/>(GMP grade, batch 1)</b> | Supernatant        | p24 ELISA    | Negative      |
|                                       | Supernatant        | psi-gag PCR  | Negative      |
|                                       | Co-culture         | p24 ELISA    | Negative      |
|                                       | Co-culture         | psi-gag PCR  | Negative      |
| <b>Cal-1<br/>(GMP grade, batch 2)</b> | Supernatant        | p24 ELISA    | Negative      |
|                                       | Supernatant        | psi-gag PCR  | Negative      |
|                                       | Co-culture         | p24 ELISA    | Negative      |
|                                       | Co-culture         | psi-gag PCR  | Negative      |
