# Supplementary figures and images for: Preclinical safety and efficacy of an anti–HIV-1 lentiviral vector containing a short hairpin RNA to CCR5 and the C46 fusion inhibitor
Source: PubMed Central journal article supplement — Mol Ther Methods Clin Dev. 2014 Feb 12;1:11–. doi: 10.1038/mtm.2013.11 (PMC4365823; doi:10.1038/mtm.2013.11), 2014-02-12

Figure S1

a.

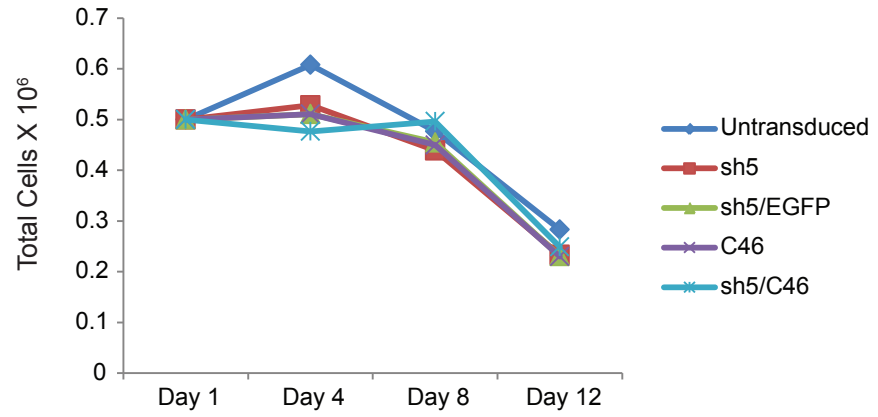

b.

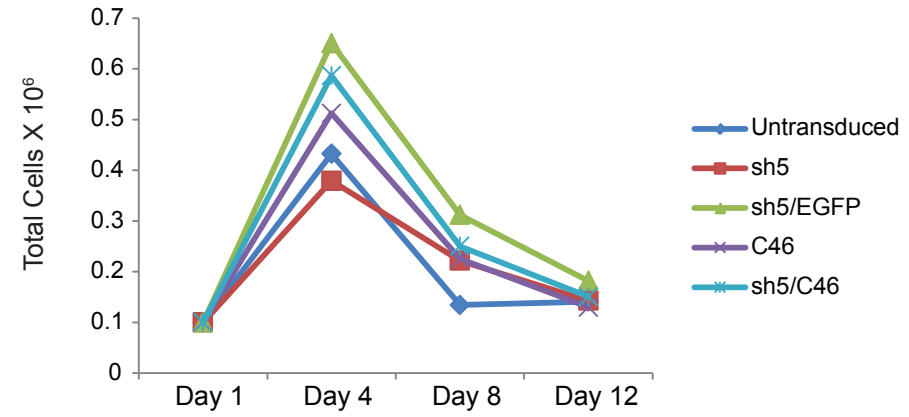

Supplement: mtm201311-s1.pdf [file mtm201311-s1.pdf]
